# Supplementary material for: Closed-loop oxygen control for patients with hypoxaemia during hospitalisation: a living systematic review and meta-analysis protocol
Source: PubMed Central journal article supplement — BMJ Open. 2022 Dec 12;12(12):e062299. doi: 10.1136/bmjopen-2022-062299 (PMC9748949; doi:10.1136/bmjopen-2022-062299), 2022-12-12
Supplement: bmjopen-2022-062299.draft_revisions.pdf [file bmjopen-2022-062299.draft_revisions.pdf]

# BMJ Open

BMJ Open is committed to open peer review. As part of this commitment we make the peer review history of every article we publish publicly available.

When an article is published we post the peer reviewers' comments and the authors' responses online. We also post the versions of the paper that were used during peer review. These are the versions that the peer review comments apply to.

The versions of the paper that follow are the versions that were submitted during the peer review process. They are not the versions of record or the final published versions. They should not be cited or distributed as the published version of this manuscript.

BMJ Open is an open access journal and the full, final, typeset and author-corrected version of record of the manuscript is available on our site with no access controls, subscription charges or pay-per-view fees (<http://bmjopen.bmj.com>).

If you have any questions on BMJ Open's open peer review process please email [info.bmjopen@bmj.com](mailto:info.bmjopen@bmj.com)

# BMJ Open

## Closed-loop oxygen control for hypoxemic patients during hospitalization: a living systematic review and meta-analysis protocol

|                               |                                                                                                                                                                                                                                                                                                                                                                                                                                                                                                                                                                                                                                                       |
|-------------------------------|-------------------------------------------------------------------------------------------------------------------------------------------------------------------------------------------------------------------------------------------------------------------------------------------------------------------------------------------------------------------------------------------------------------------------------------------------------------------------------------------------------------------------------------------------------------------------------------------------------------------------------------------------------|
| Journal:                      | <i>BMJ Open</i>                                                                                                                                                                                                                                                                                                                                                                                                                                                                                                                                                                                                                                       |
| Manuscript ID                 | bmjopen-2022-062299                                                                                                                                                                                                                                                                                                                                                                                                                                                                                                                                                                                                                                   |
| Article Type:                 | Protocol                                                                                                                                                                                                                                                                                                                                                                                                                                                                                                                                                                                                                                              |
| Date Submitted by the Author: | 22-Feb-2022                                                                                                                                                                                                                                                                                                                                                                                                                                                                                                                                                                                                                                           |
| Complete List of Authors:     | Mol, Caroline; Hospital Israelita Albert Einstein, Department of Critical Care Medicine<br>Vieira, Aléxia; Hospital Israelita Albert Einstein, Department of Critical Care Medicine<br>Garcia, Bianca; Hospital Israelita Albert Einstein, Department of Critical Care Medicine<br>Pereira, Emanuel; Hospital Israelita Albert Einstein, Department of Critical Care Medicine<br>Caserta, Raquel; Hospital Israelita Albert Einstein, Department of Critical Care Medicine<br>Pinto, Ana; Universidade Federal de Sao Paulo, Evidence-Based Health Program<br>Nawa, Ricardo; Hospital Israelita Albert Einstein, Department of Critical Care Medicine |
| Keywords:                     | INTENSIVE & CRITICAL CARE, Adult intensive & critical care <<br>INTENSIVE & CRITICAL CARE, RESPIRATORY MEDICINE (see Thoracic Medicine)                                                                                                                                                                                                                                                                                                                                                                                                                                                                                                               |
|                               |                                                                                                                                                                                                                                                                                                                                                                                                                                                                                                                                                                                                                                                       |

SCHOLARONE™  
Manuscripts

# Closed-loop oxygen control for hypoxemic patients during hospitalization: a living systematic review and meta-analysis protocol

- **Caroline Gomes Mól**, Department of Critical Care Medicine, Hospital Israelita Albert Einstein, São Paulo, Brazil, [caroline.rodrigues@einstein.br](mailto:caroline.rodrigues@einstein.br)
- **Aléxia Gabriela da Silva Vieira**, Department of Critical Care Medicine, Hospital Israelita Albert Einstein, São Paulo, Brazil, [alexia.vieira@einstein.br](mailto:alexia.vieira@einstein.br)
- **Bianca Maria Schneider Pereira Garcia**, Department of Critical Care Medicine, Hospital Israelita Albert Einstein, São Paulo, Brazil, [bianca.garcia@einstein.br](mailto:bianca.garcia@einstein.br)
- **Emanuel dos Santos Pereira**, Department of Critical Care Medicine, Hospital Israelita Albert Einstein, São Paulo, Brazil, [emanuel.pereira@einstein.br](mailto:emanuel.pereira@einstein.br)
- **Raquel Afonso Caserta Eid**, Department of Critical Care Medicine, Hospital Israelita Albert Einstein, São Paulo, Brazil, [raquel.caserta@einstein.br](mailto:raquel.caserta@einstein.br)
- **Ana Carolina Pereira Nunes Pinto**, Evidence-Based Health Program, Escola Paulista de Medicina (EPM) – Universidade Federal de São Paulo (UNIFESP), São Paulo, Brazil, and Universidade Federal do Amapá (UNIFAP), Amapá, Brazil, [anacarolinapnp@hotmail.com](mailto:anacarolinapnp@hotmail.com)
- **Ricardo Kenji Nawa\***, Department of Critical Care Medicine, Hospital Israelita Albert Einstein, São Paulo, SP, Brazil, [ricardo.nawa@einstein.br](mailto:ricardo.nawa@einstein.br)

**Word count:** 1953 words

**\*Corresponding author**

Ricardo Kenji Nawa  
Department of Critical Care Medicine  
Hospital Israelita Albert Einstein  
Avenida Albert Einstein, no. 627 / 701  
ZIP: 05652- 900 – Sao Paulo, SP / Brazil.  
E-mail: [ricardo.nawa@einstein.br](mailto:ricardo.nawa@einstein.br)

## Abstract

**Introduction:** The oxygen is the most common drug used in critical care patients to correct episodes of hypoxemia. The adoption of new technologies in clinical practice, as closed-loop systems for an automatic oxygen titration, may improve outcomes and reduce the healthcare professionals' workload at the bedside, however, certainty of the evidence about the safety and benefits are still low. We aim to evaluate the effectiveness, efficacy and safety of the closed-loop oxygen control for hypoxemic patients during the hospitalization period by conducting a systematic review and meta-analysis. **Methods and analysis:** MEDLINE, CENTRAL, EMBASE, LILACS, CINAHL and LOVE evidence databases will be searched. Randomized controlled trials and crossover studies investigating the PICO will be included. The primary outcomes will be the time in the SpO<sub>2</sub> target. Secondary outcomes will include time for oxygen weaning; length of stay; costs; adverse events; mortality; and healthcare professionals workload. Two reviewers will independently screen and extract data and perform quality assessment of included studies. The Cochrane risk of bias tool will be used to assess risk of bias. The RevMan V5.4 software will be used for statistical analysis. Heterogeneity will be analyzed using I<sup>2</sup> statistics. Mean difference or standardized mean difference with 95% CI and *p* value will be used to calculate treatment effect for outcome variables. **Ethics and dissemination:** Ethical approval is not required because this systematic review and meta-analysis is based on previously published data. Final results will be published in peer-reviewed journals and presented at relevant conferences and events. **PROSPERO registration number:** [CRD 42022306033]

**Keywords:** Oxygen; oxygen inhalation therapy; hypoxia; hyperoxia; artificial intelligence; machine learning.

## Introduction

The oxygen is vital for cellular metabolism and it is considered the most common drug used in critical care patients to correct episodes of hypoxemia [1,2]. Low levels of oxygen in the arterial blood is frequently associated with impairment of adequate gas exchange [1,2], and prolonged cellular hypoxia promotes rapid and severe organ injuries triggered by natural adaptive mechanisms [2,3]. Thus, the supplemental oxygen administration can be considered a lifesaving treatment, and may reduce the morbidity and mortality associated with hypoxemia [1,4].

Despite the benefits of oxygen therapy indication, either hypoxemia or hyperoxia, have potential harmful side effects and complications [5–8]. The literature suggests safe and acceptable targets of peripheral oxygen saturation ( $SpO_2$ ) are between 92-98% for patients without lung diseases, and 88-92% for patients with previous lung diseases [9,10]. However, the patients' need for oxygen varies during hospital stay, and the manual adjustment to promote adequate oxygen delivery titration has been shown to be ineffective [9]. A precise delivery oxygen method for maintaining the  $SpO_2$  inside the target is challenging [10–12]. It is even more challenging when we look at patients requiring invasive mechanical ventilation (IMV) support admitted to the intensive care unit (ICU), who commonly need supplemental oxygen administration during ICU and hospital stay [1,2,4].

The use of artificial intelligence (AI) and machine learning (ML) is increasing in health science to make predictions, improve the interpretation of monitored data and support decision-making [10]. Closed-loop systems are part of these advances, using a feedback principle to maintain a given variable around a desired set point [10–12]. Delivery oxygen devices based on closed-loop

1  
2  
3 technology have been developed and utilized in patient care in order to provide  
4 a real-time adjustment of oxygen titration, based on patients' SpO<sub>2</sub> avoiding  
5 episodes of hypoxemia or hyperoxia [11,12]. The adoption of new technologies  
6 of AI and ML in clinical practice, may reduce the healthcare professionals'  
7 workload at the bedside, however, certainty of the evidence about the safety and  
8 benefits are still low [11,12]. It is still unclear whether closed-loop oxygen control  
9 devices could improve clinical outcomes, and with the technological advances,  
10 new randomized clinical trials (RCTs) have been published since the last two  
11 systematic reviews were conducted [11,12]. Thus, the aim of this systematic  
12 review is to investigate the effectiveness, efficacy and safety of the closed-loop  
13 oxygen control for hypoxemic patients during the hospitalization.

## 28 **Methods and analysis**

31 This study is reported in accordance with the Preferred Reporting Items for  
32 Systematic Reviews and Meta-Analysis Protocols (PRISMA-P) statement [13]  
33 and followed the recommendations of the Cochrane Collaboration Handbook.  
34 The protocol is registered at the International Prospective Register of Systematic  
35 Reviews (PROSPERO) [14], under registration number CRD42022306033.

## 43 **Search strategy**

46 A search strategy was initially designed for the Medical Literature Analysis and  
47 the Retrieval System Online – MEDLINE, via PubMed by an information  
48 specialist, responsible for assist the authors, searching potential studies for  
49 inclusion in their reviews, and for keeping up to date with Cochrane  
50 methodological developments in information retrieval. The search strategy was  
51 independently peer-reviewed by the information specialist, and afterwards will be  
52 adapted for use into five databases, as follows: 1) Cochrane Central Register of  
53  
54  
55  
56  
57  
58  
59  
60

1  
2  
3 Controlled Trials (CENTRAL) – via Wiley; 2) EMBASE – via Elsevier; 3) the Latin  
4 American the Caribbean Literature in Health Sciences (LILACS) – via Virtual  
5 Health Library; 4) CINALH – via EBSCO; and 5) LOVE evidence databases. A  
6  
7 handsearching will be performed to check preprints, editorials about the included  
8 studies, errata of published articles, and references lists from the included studies  
9  
10 and any relevant systematic review identified. We will track the randomized  
11 controlled trials in progress on a specific website (<https://ClinicalTrials.gov>) and  
12 on the World Health Organization (WHO) website. There will not be restrictions  
13 to any specific language, date or type of publication. The detailed search strategy  
14 for MEDLINE – via PubMed is shown in **Table 1**. The study selection process will  
15 be conducted by two reviewers independently, and any disagreement between  
16 the reviewers will be resolved by consensus or by consulting a third reviewer.

## 31 Inclusion criteria

32  
33 The eligibility criteria were determined using the Population, Intervention,  
34 Comparator, and Outcome (PICO) acronym [15]. The studies will be considered  
35 eligible based on the following inclusion criteria, as follows: 1) population:  
36 hospitalized adult patients requiring supplemental oxygen – either for hypoxemic  
37 patients ( $\text{SpO}_2 < 92\%$ ) or with acute chronic hypoxemia ( $\text{SpO}_2 < 88\%$ ); 2) type  
38 of interventions: any devices that allow an automatic oxygen delivery; 3) type of  
39 comparison: manual adjustments of oxygen; 4) type of outcome: time in the  $\text{SpO}_2$   
40 target, time for oxygen weaning, length of stay, costs, adverse events, mortality,  
41 and healthcare professionals workload – process optimization. Two reviewers will  
42 independently assess the titles, abstracts, and full-text published RCTs without  
43 language restriction.

## 59 Study selection

1  
2  
3 The reviewers will identify and exclude duplicates and collate multiple reports of  
4 the same study so that each study, rather than each report, is the unit of interest  
5 in the review. For the selection process we will use Rayyan – a web and mobile  
6 app for systematic reviews software [16]. The selection process will be recorded  
7 in sufficient detail to complete the Preferred Reporting Items for Systematic  
8 Review and Meta-Analysis (PRISMA) flow diagram (**Figure 1**). Two review  
9 authors will independently screen the titles and abstracts of all the potential  
10 studies we identify as a result of the search. All the potential full-texts of the  
11 articles that fulfilled eligibility criteria will be included. If a consensus will not be  
12 reached, a third reviewer will be consulted to solve potential disagreements  
13 regarding the included articles.

## 28 **Outcome measures**

31 The primary outcome of interest will be the time in the peripheral arterial oxygen  
32 saturation target. Secondary outcomes of interest will be the time for oxygen  
33 weaning, length of stay, costs, adverse events, mortality, and healthcare  
34 professional's workload.

## 40 **Data extraction**

43 Two reviewers will independently extract the data on a standard worksheet. The  
44 data will be extracted from each included study utilizing a standardized  
45 spreadsheet developed at Microsoft Excel, as follows: authors, year, protocol  
46 number, DOI, study type, country of publication; the participants demographics  
47 (i.e.: age, gender, inclusion and exclusion criteria, number of participants,  
48 diseases, severity scores, severity of condition, comorbidity, phase of  
49 hypoxemia), Interventions – type of device and form of delivery (i.e.: mechanical  
50 ventilation or conventional oxygen therapy), duration of intervention, follow-up,  
51  
52  
53  
54  
55  
56  
57  
58  
59  
60



1  
2  
3 Comparators and Outcomes – defined in this review. We will also extract  
4 variables, as follows: the time in the target SpO<sub>2</sub> and other relevant variables to  
5 answer the review question (i.e.: time for oxygen weaning, length of stay, costs,  
6 adverse events, mortality, health professional’s workload – process optimization).  
7  
8 Additionally, we will extract data from the funding, sponsorship of the included  
9 studies and notable conflicts of interest of trial authors. For missing data, we will  
10 contact the corresponding authors of the studies through the email provided. In  
11 case of crossover studies inclusions, we will consider a paired analysis or if carry-  
12 over is thought to be a problem, the first period will be used to perform the  
13 analysis. If the data are homogeneous for conducting meta-analyses, one review  
14 author will transfer data into the Review Manager (RevMan) version 5.4 software.  
15 We will double-check if the data are correctly entered by comparing the data  
16 presented in the systematic review with those in the study report.  
17  
18  
19  
20  
21  
22  
23  
24  
25  
26  
27  
28  
29  
30  
31

## 32 **Methodological quality assessment**

33  
34  
35  
36 The risk of bias of the included trials will be assessed using the Cochrane Risk  
37 of Bias 2 (RoB2) tool for randomized trials.  
38  
39

## 40 **Risk of bias**

41  
42  
43 The assessment of the risk of bias of individual studies was performed as  
44 recommended by the Cochrane Collaboration Handbook [17]. The Risk of Bias  
45 tool 2 [18] will be used to evaluate the risk of bias according to five domains: 1)  
46 bias arising from the randomization process; 2) bias due to deviations from  
47 intended interventions; 3) bias due to missing outcome data; 4) bias in  
48 measurement of the outcome; and 5) bias in selection of the reported result. Each  
49 domain will be considered within one of the three levels, as follows: low risk of  
50 bias, some concerns, or high risk of bias [18]. We involved a third reviewer if a  
51  
52  
53  
54  
55  
56  
57  
58  
59  
60

1  
2  
3 consensus could not be reached. The reviewers will reach concurrence on the  
4 final judgment of all the included trials and the result will be displayed in a table  
5 or graph.  
6  
7  
8  
9

## 10 **Assessment of bias in conducting the systematic review**

11  
12  
13 The review will be conducted according to this published protocol and any  
14 deviation will be reported in the "differences between protocol and review" section  
15 of the systematic review.  
16  
17  
18  
19

## 20 **Assessment of certainty of evidence**

21  
22  
23 The Grading of Recommendations Assessment, Development and Evaluation  
24 (GRADE) system will be used to measure and summarize the overall of the  
25 current evidence of each outcome [19]. The GRADE system consists of five  
26 items: 1) study limitations – risk of bias; 2) inconsistency of results  
27 (heterogeneity); 3) indirectness of evidence; 4) imprecision of the effect  
28 estimates, and 5) reporting bias. The quality of the evidence was classified into  
29 four categories, as follows: high, moderate, low, and very low; and it was related  
30 to the studies that contributed data for the main prespecified outcomes. All  
31 analyses were performed using GRADEpro Guideline Development Tool  
32 (GRADEpro GDT) software [20]. Two authors will rate independently and a third  
33 author will address any discrepancy.  
34  
35  
36  
37  
38  
39  
40  
41  
42  
43  
44  
45  
46  
47

## 48 **Data synthesis**

49  
50  
51 Review Manager V.5.4 (Cochrane Collaboration) software will be used to conduct  
52 the meta-analysis if appropriate – that is: statistically and clinically homogenous.  
53 A random-effects model will be used. The mean difference or standardized mean  
54 difference will be used to analyze continuous variables with 95% CI. Dichotomous  
55  
56  
57  
58  
59  
60

1  
2  
3 outcomes will be presented as risk ratios (RR) with 95% CI. Heterogeneity among  
4 included trials will be measure using the  $I^2$  statistic. If it's identified as substantial  
5 heterogeneity, we will report and explore through a pre-specified subgroup  
6 analysis. In addition, sensitivity analysis will be performed through separate  
7 analyzes of studies judged to have a high risk of bias or methodological weakness  
8 judged to be important. In cases where the combination of data is not possible to  
9 allow the meta-analysis, we will carry out only a qualitative synthesis of each  
10 included study, of the ongoing studies identified in our search and of the  
11 publication bias analysis.  
12  
13  
14  
15  
16  
17  
18  
19  
20  
21  
22

## 23 **Subgroup analysis**

24 We plan to perform analysis of subgroups, as follows: underlying disease;  
25 hypoxemia stage (acute versus chronic); and SpO<sub>2</sub> target (threshold < 92%  
26 versus > 92%).  
27  
28  
29  
30  
31  
32

## 33 **Ethics and dissemination**

34 The ethical approval and additional informed consent application are not required  
35 because this systematic review is based on previously published data. The final  
36 results will be published in a peer-reviewed journal.  
37  
38  
39  
40  
41  
42

## 43 **Patient and public involvement**

44 No patient or public involved. Only data already existent in the literature and the  
45 aforementioned sources will be used for this study.  
46  
47  
48  
49  
50

## 51 **Author Contributions**

52 All authors have made significant contributions to this study protocol. The  
53 protocol was substantially designed by CGM, AGV, RKN and refined by ACP.  
54  
55  
56  
57  
58  
59  
60

CGM and RKN drafted the manuscript. All authors edited the manuscript, read, and approved the final version.

## Funding

The authors declare this research received no specific grant from any funding agency in the public, commercial or not-for-profit sectors

## Competing of interests

None declared.

## Data statement

Not applicable.

## Patient and public involvement

Patients and/or the public were not involved in the design, or conduct, or reporting, or dissemination plans of this research.

## Patient consent for publication

Not required.

## Article Summary

### Strengths and Limitations

- This study will be reported in accordance with the Preferred Reporting Items for Systematic Reviews and Meta-Analysis Protocols (PRISMA-P) guidelines.
- The steps of data screening, extraction and methodological quality assessment will be performed by two reviewers independently.
- Standardized methodological evaluation tools will be used to assess the risk of bias of included studies in the review.

- The absence of sufficient high-quality studies, heterogeneity in the interventions, high missing or dropout and small sample size might be the limitations for this systematic review.

## Figure legends

**Figure 1** – Preferred reporting items for systematic reviews and meta-analyses – PRISMA flow diagram describing the search strategy.

## ORCID IDs

Caroline Gomes Mól, <http://orcid.org/0000-0001-9493-0150>

Aléxia Gabriela da Silva Vieira, <http://orcid.org/0000-0002-6048-716X>

Bianca Maria Schneider Pereira Garcia, <http://orcid.org/0000-0003-1863-109X>

Emanuel dos Santos Pereira, <http://orcid.org/0000-0001-8620-3420>

Raquel Afonso Caserta Eid, <http://orcid.org/0000-0002-8241-3241>

Ana Carolina Pereira Nunes Pinto, <http://orcid.org/0000-0002-1505-877X>

Ricardo Kenji Nawa, <http://orcid.org/0000-0002-0852-7013>

## References

- 1 Gilbert-Kawai ET, Mitchell K, Martin D, *et al.* Permissive hypoxaemia versus normoxaemia for mechanically ventilated critically ill patients. *Cochrane Database Syst Rev* 2014;:CD009931. doi:10.1002/14651858.CD009931.pub2
- 2 O'Driscoll BR, Smith R. Oxygen Use in Critical Illness. *Respir Care* 2019;**64**:1293–307. doi:10.4187/respcare.07044
- 3 Allardet-Servent J, Sicard G, Metz V, *et al.* Benefits and risks of oxygen therapy during acute medical illness: Just a matter of dose! *Rev Med Interne* 2019;**40**:670–6. doi:10.1016/j.revmed.2019.04.003
- 4 de Jonge E, Peelen L, Keijzers PJ, *et al.* Association between administered oxygen, arterial partial oxygen pressure and mortality in mechanically ventilated intensive care unit patients. *Crit Care* 2008;**12**:R156. doi:10.1186/cc7150
- 5 Barbateskovic M, Schjørring OL, Krauss SR, *et al.* Higher vs Lower Oxygenation Strategies in Acutely Ill Adults. *Chest*. 2021;**159**:154–73. doi:10.1016/j.chest.2020.07.015
- 6 Valencia Gallardo JM, Solé Violán J, Rodríguez de Castro F. [Translated article] Oxygen therapy. Considerations regarding its use in acute ill

- 1  
2  
3 patients. *Arch Bronconeumol* 2022;**58**:T102–3.  
4 doi:10.1016/j.arbres.2021.03.024  
5
- 6 7 Chu DK, Kim LH-Y, Young PJ, *et al.* Mortality and morbidity in acutely ill  
7 adults treated with liberal versus conservative oxygen therapy (IOTA): a  
8 systematic review and meta-analysis. *Lancet* 2018;**391**:1693–705.  
9 doi:10.1016/S0140-6736(18)30479-3  
10
- 11 8 Li L, Zhang Y, Wang P, *et al.* Conservative versus liberal oxygen therapy  
12 for acutely ill medical patients: A systematic review and meta-analysis. *Int J*  
13 *Nurs Stud* 2021;**118**:103924. doi:10.1016/j.ijnurstu.2021.103924  
14
- 15 9 Website. British thoracic Society emergency oxygen audit report national  
16 audit period [https://www.brit-thoracic.org.uk/document-library/quality-](https://www.brit-thoracic.org.uk/document-library/quality-improvement/audit-reports/emergency-oxygen-2015/)  
17 [improvement/audit-reports/emergency-oxygen-2015/](https://www.brit-thoracic.org.uk/document-library/quality-improvement/audit-reports/emergency-oxygen-2015/)  
18
- 19 10 Rush B, Celi LA, Stone DJ. Applying machine learning to continuously  
20 monitored physiological data. *J Clin Monit Comput* 2019;**33**:887–93.  
21 doi:10.1007/s10877-018-0219-z  
22
- 23 11 Denault M-H, Péloquin F, Lajoie A-C, *et al.* Automatic versus Manual  
24 Oxygen Titration in Patients Requiring Supplemental Oxygen in the  
25 Hospital: A Systematic Review and Meta-Analysis. *Respiration*  
26 2019;**98**:178–88. doi:10.1159/000499119  
27
- 28 12 Sanchez-Morillo D, Olaby O, Fernandez-Granero MA, *et al.* Physiological  
29 closed-loop control in intelligent oxygen therapy: A review. *Comput*  
30 *Methods Programs Biomed* 2017;**146**:101–8.  
31 doi:10.1016/j.cmpb.2017.05.013  
32
- 33 13 Shamseer L, Moher D, Clarke M, *et al.* Preferred reporting items for  
34 systematic review and meta-analysis protocols (PRISMA-P) 2015:  
35 elaboration and explanation. *BMJ* 2015;**350**:g7647. doi:10.1136/bmj.g7647  
36
- 37 14 PROSPERO. <http://www.crd.york.ac.uk/PROSPERO> (accessed 31 Jan  
38 2022).  
39
- 40 15 Website. Thomas J, Kneale D, Mckenzie JE, *et al.* Chapter 2: Determining  
41 the scope of the review and the questions it will address. In  
42 2021;6. Available from [www.training.cochrane.org/handbook](http://www.training.cochrane.org/handbook)  
43
- 44 16 Ouzzani M, Hammady H, Fedorowicz Z, *et al.* Rayyan-a web and mobile  
45 app for systematic reviews. *Syst Rev* 2016;**5**:210. doi:10.1186/s13643-016-  
46 0384-4  
47
- 48 17 Higgins JPT, Thomas J. *Cochrane Handbook for Systematic Reviews of*  
49 *Interventions*. John Wiley & Sons 2019.  
50 [https://books.google.com/books/about/Cochrane\\_Handbook\\_for\\_Systemati](https://books.google.com/books/about/Cochrane_Handbook_for_Systematic_Reviews.html?hl=&id=G1SyDwAAQBAJ)  
51 [c\\_Reviews.html?hl=&id=G1SyDwAAQBAJ](https://books.google.com/books/about/Cochrane_Handbook_for_Systematic_Reviews.html?hl=&id=G1SyDwAAQBAJ)  
52
- 53 18 Higgins JPT, Altman DG, Gotzsche PC, *et al.* The Cochrane Collaboration's  
54 tool for assessing risk of bias in randomised trials. *BMJ*. 2011;**343**:d5928–  
55 d5928. doi:10.1136/bmj.d5928  
56
- 57 19 GRADE handbook. <http://guidelinedevelopment.org/handbook> (accessed  
58 31 Jan 2022).  
59
- 60 20 GRADEpro. <http://gradepro.org> (accessed 31 Jan 2022).

**Table 1** – Search strategy for MEDLINE via PubMed.

| Search strategy for PubMed |                                                                                                                                                                                                                                                                                                                                                                                                                                                               |
|----------------------------|---------------------------------------------------------------------------------------------------------------------------------------------------------------------------------------------------------------------------------------------------------------------------------------------------------------------------------------------------------------------------------------------------------------------------------------------------------------|
| Number                     | Search terms                                                                                                                                                                                                                                                                                                                                                                                                                                                  |
| #1                         | "Oxygen Inhalation Therapy"[Mesh] OR "Oxygen"[Mesh] OR oxygen*[tiab] OR Dioxygen[tiab] OR O2[tiab] OR FiO2[tiab]                                                                                                                                                                                                                                                                                                                                              |
| #2                         | concentrat*[tiab] OR inspir*[tiab] OR inhal*[tiab] OR level*[tiab] OR tension*[tiab] OR fraction*[tiab] OR arterial*[tiab] OR saturation supply*[tiab] OR supplement*[tiab] OR supplie*[tiab] OR therap*[tiab] OR administr*[tiab] OR dosag*[tiab] OR dose*[tiab] OR dosing*[tiab] OR titrat*[tiab] OR deliver*[tiab]                                                                                                                                         |
| #3                         | automat*[tiab] OR algorithms[tiab] OR system*[tiab] OR closed-loop[tiab] OR closed loop[tiab] OR intelligen*[tiab] OR targeted[tiab] OR machine learning[tiab]                                                                                                                                                                                                                                                                                                |
| #4                         | adul*[All Fields] OR middle aged[sb] OR age[tw] OR aged[tiab] OR aged[MESH] OR geriatric*[tiab] OR geriatrics[MESH] OR elder*[tiab] OR olding[tiab] OR ageing[tiab] OR aging[tiab] OR aging[MESH] OR "frail elderly"[MESH])                                                                                                                                                                                                                                   |
| #5                         | SpO2[tw] OR oxygen saturation[tw] OR Blood Oxygen Level*[tw] OR Saturation of Peripheral Oxygen[tw] OR oxygen weaning[tw] OR FiO2 weaning[tw] OR Length of stay*[tw] OR Cost*[tw] OR Adverse event*[tw] OR adverse effect*[tw] OR Near Misse*[tw] OR Side Effect*[tw] OR Adverse Reaction*[tw] OR Toxicity[tw] OR Mortalit*[tw] OR Fatality Rate*[tw] OR Death[tw] OR Workload*[tw] OR Work Load*[tw] OR process optimization[tw] OR Quality Improvement*[tw] |
| #6                         | ((clinical[Title/Abstract] AND trial[Title/Abstract]) OR clinical trials as topic[MeSH Terms] OR clinical trial[Publication Type] OR random*[Title/Abstract] OR random allocation[MeSH Terms] OR therapeutic use[MeSH Subheading])                                                                                                                                                                                                                            |
| #7                         | #1 AND #2 AND #3 AND #4 AND #5 AND #6                                                                                                                                                                                                                                                                                                                                                                                                                         |
| #8                         | (animals [mh] NOT humans [mh])                                                                                                                                                                                                                                                                                                                                                                                                                                |
| #9                         | #7 NOT #8                                                                                                                                                                                                                                                                                                                                                                                                                                                     |

This search strategy was modified as required for other electronic databases.

1  
2  
3  
4  
5  
6  
7  
8  
9  
10  
11  
12  
13  
14  
15  
16  
17  
18  
19  
20  
21  
22  
23  
24  
25  
26  
27  
28  
29  
30  
31  
32  
33  
34  
35  
36  
37  
38  
39  
40  
41  
42  
43  
44  
45  
46  
47  
48  
49  
50  
51  
52  
53  
54  
55  
56  
57  
58  
59  
60

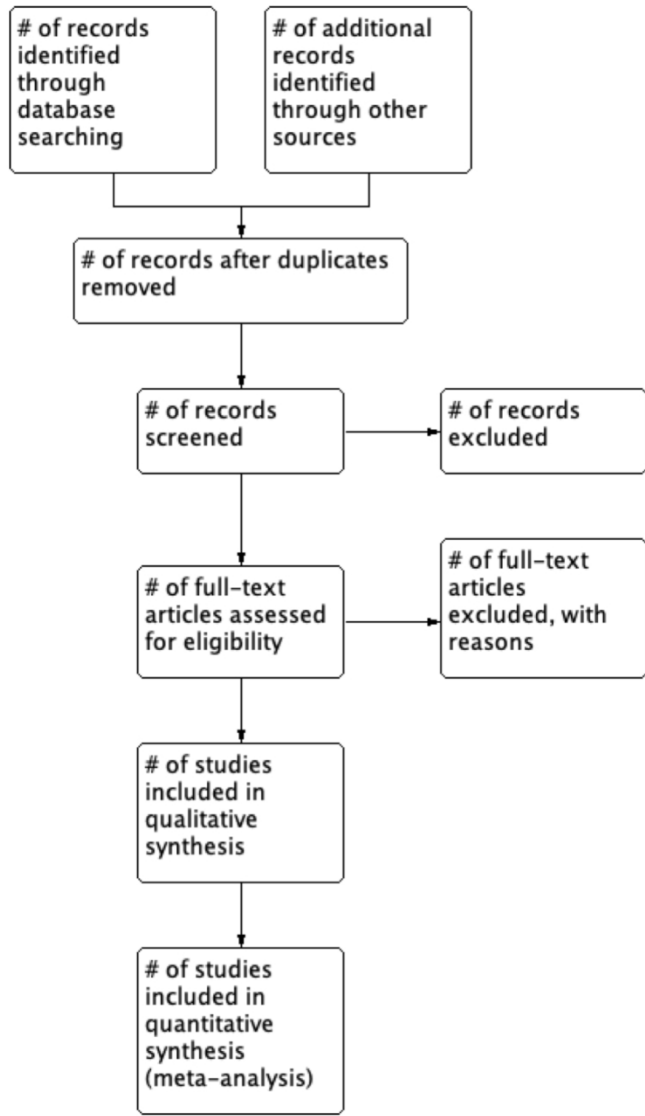

Preferred reporting items for systematic reviews and meta-analyses – PRISMA flow diagram describing the search strategy.

190x275mm (166 x 166 DPI)



## The Preferred Reporting Items for Systematic Review and Meta-Analysis Protocols (PRISMA-P) checklist.

| Section and topic                 | Item No | Checklist item                                                                                                                                                                                                                | Page No |
|-----------------------------------|---------|-------------------------------------------------------------------------------------------------------------------------------------------------------------------------------------------------------------------------------|---------|
| <b>Administrative information</b> |         |                                                                                                                                                                                                                               |         |
| Title:                            |         |                                                                                                                                                                                                                               |         |
| Identification                    | 1a      | Identify the report as a protocol of a systematic review                                                                                                                                                                      | 01      |
| Update                            | 1b      | If the protocol is for an update of a previous systematic review, identify as such                                                                                                                                            | 04      |
| Registration                      | 2       | If registered, provide the name of the registry (such as PROSPERO) and registration number                                                                                                                                    | 02, 04  |
| Authors:                          |         |                                                                                                                                                                                                                               |         |
| Contact                           | 3a      | Provide name, institutional affiliation, e-mail address of all protocol authors; provide physical mailing address of corresponding author                                                                                     | 01      |
| Contributions                     | 3b      | Describe contributions of protocol authors and identify the guarantor of the review                                                                                                                                           | 09      |
| Amendments                        | 4       | If the protocol represents an amendment of a previously completed or published protocol, identify as such and list changes; otherwise, state plan for documenting important protocol amendments                               | 08      |
| Support:                          |         |                                                                                                                                                                                                                               |         |
| Sources                           | 5a      | Indicate sources of financial or other support for the review                                                                                                                                                                 | 09      |
| Sponsor                           | 5b      | Provide name for the review funder and/or sponsor                                                                                                                                                                             | NA      |
| Role of sponsor or funder         | 5c      | Describe roles of funder(s), sponsor(s), and/or institution(s), if any, in developing the protocol                                                                                                                            | NA      |
| <b>Introduction</b>               |         |                                                                                                                                                                                                                               |         |
| Rationale                         | 6       | Describe the rationale for the review in the context of what is already known                                                                                                                                                 | 03, 04  |
| Objectives                        | 7       | Provide an explicit statement of the question(s) the review will address with reference to participants, interventions, comparators, and outcomes (PICO)                                                                      | 04      |
| <b>Methods</b>                    |         |                                                                                                                                                                                                                               |         |
| Eligibility criteria              | 8       | Specify the study characteristics (such as PICO, study design, setting, time frame) and report characteristics (such as years considered, language, publication status) to be used as criteria for eligibility for the review | 05      |
| Information sources               | 9       | Describe all intended information sources (such as electronic databases, contact with study authors, trial registers or other grey literature sources) with planned dates of coverage                                         | 04,05   |

|                                    |     |                                                                                                                                                                                                                                                  |        |
|------------------------------------|-----|--------------------------------------------------------------------------------------------------------------------------------------------------------------------------------------------------------------------------------------------------|--------|
| Search strategy                    | 10  | Present draft of search strategy to be used for at least one electronic database, including planned limits, such that it could be repeated                                                                                                       | 13     |
| Study records:                     |     |                                                                                                                                                                                                                                                  |        |
| Data management                    | 11a | Describe the mechanism(s) that will be used to manage records and data throughout the review                                                                                                                                                     | 06, 07 |
| Selection process                  | 11b | State the process that will be used for selecting studies (such as two independent reviewers) through each phase of the review (that is, screening, eligibility and inclusion in meta-analysis)                                                  | 06     |
| Data collection process            | 11c | Describe planned method of extracting data from reports (such as piloting forms, done independently, in duplicate), any processes for obtaining and confirming data from investigators                                                           | 06, 07 |
| Data items                         | 12  | List and define all variables for which data will be sought (such as PICO items, funding sources), any pre-planned data assumptions and simplifications                                                                                          | 06, 07 |
| Outcomes and prioritization        | 13  | List and define all outcomes for which data will be sought, including prioritization of main and additional outcomes, with rationale                                                                                                             | 06, 07 |
| Risk of bias in individual studies | 14  | Describe anticipated methods for assessing risk of bias of individual studies, including whether this will be done at the outcome or study level, or both; state how this information will be used in data synthesis                             | 07, 08 |
| Data synthesis                     | 15a | Describe criteria under which study data will be quantitatively synthesized                                                                                                                                                                      | 08, 09 |
|                                    | 15b | If data are appropriate for quantitative synthesis, describe planned summary measures, methods of handling data and methods of combining data from studies, including any planned exploration of consistency (such as $I^2$ , Kendall's $\tau$ ) | 08, 09 |
|                                    | 15c | Describe any proposed additional analyses (such as sensitivity or subgroup analyses, meta-regression)                                                                                                                                            | 08, 09 |
|                                    | 15d | If quantitative synthesis is not appropriate, describe the type of summary planned                                                                                                                                                               | 09     |
| Meta-bias(es)                      | 16  | Specify any planned assessment of meta-bias(es) (such as publication bias across studies, selective reporting within studies)                                                                                                                    | NA     |
| Confidence in cumulative evidence  | 17  | Describe how the strength of the body of evidence will be assessed (such as GRADE)                                                                                                                                                               | 08     |

# BMJ Open

## Closed-loop oxygen control for hypoxemic patients during hospitalization: a living systematic review and meta-analysis protocol

|                                 |                                                                                                                                                                                                                                                                                                                                                                                                                                                                                                                                                                                                                                                       |
|---------------------------------|-------------------------------------------------------------------------------------------------------------------------------------------------------------------------------------------------------------------------------------------------------------------------------------------------------------------------------------------------------------------------------------------------------------------------------------------------------------------------------------------------------------------------------------------------------------------------------------------------------------------------------------------------------|
| Journal:                        | <i>BMJ Open</i>                                                                                                                                                                                                                                                                                                                                                                                                                                                                                                                                                                                                                                       |
| Manuscript ID                   | bmjopen-2022-062299.R1                                                                                                                                                                                                                                                                                                                                                                                                                                                                                                                                                                                                                                |
| Article Type:                   | Protocol                                                                                                                                                                                                                                                                                                                                                                                                                                                                                                                                                                                                                                              |
| Date Submitted by the Author:   | 22-Aug-2022                                                                                                                                                                                                                                                                                                                                                                                                                                                                                                                                                                                                                                           |
| Complete List of Authors:       | Mol, Caroline; Hospital Israelita Albert Einstein, Department of Critical Care Medicine<br>Vieira, Aléxia; Hospital Israelita Albert Einstein, Department of Critical Care Medicine<br>Garcia, Bianca; Hospital Israelita Albert Einstein, Department of Critical Care Medicine<br>Pereira, Emanuel; Hospital Israelita Albert Einstein, Department of Critical Care Medicine<br>Caserta, Raquel; Hospital Israelita Albert Einstein, Department of Critical Care Medicine<br>Pinto, Ana; Universidade Federal de Sao Paulo, Evidence-Based Health Program<br>Nawa, Ricardo; Hospital Israelita Albert Einstein, Department of Critical Care Medicine |
| <b>Primary Subject Heading</b>: | Intensive care                                                                                                                                                                                                                                                                                                                                                                                                                                                                                                                                                                                                                                        |
| Secondary Subject Heading:      | Respiratory medicine                                                                                                                                                                                                                                                                                                                                                                                                                                                                                                                                                                                                                                  |
| Keywords:                       | INTENSIVE & CRITICAL CARE, Adult intensive & critical care < INTENSIVE & CRITICAL CARE, RESPIRATORY MEDICINE (see Thoracic Medicine)                                                                                                                                                                                                                                                                                                                                                                                                                                                                                                                  |
|                                 |                                                                                                                                                                                                                                                                                                                                                                                                                                                                                                                                                                                                                                                       |

SCHOLARONE™  
Manuscripts

1  
2  
3  
4  
5  
6  
7  
8  
9  
10  
11  
12  
13  
14  
15  
16  
17  
18  
19  
20  
21  
22  
23  
24  
25  
26  
27  
28  
29  
30  
31  
32  
33  
34  
35  
36  
37  
38  
39  
40  
41  
42  
43  
44  
45  
46  
47  
48  
49  
50  
51  
52  
53  
54  
55  
56  
57  
58  
59  
60

# Closed-loop oxygen control for hypoxemic patients during hospitalization: a living systematic review and meta-analysis protocol

- **Caroline Gomes Mól**, Hospital Israelita Albert Einstein, São Paulo, SP – Brazil, [caroline.rodrigues@einstein.br](mailto:caroline.rodrigues@einstein.br)
- **Aléxia Gabriela da Silva Vieira**, Hospital Israelita Albert Einstein, São Paulo, SP – Brazil, [alexia.vieira@einstein.br](mailto:alexia.vieira@einstein.br)
- **Bianca Maria Schneider Pereira Garcia**, Hospital Israelita Albert Einstein, São Paulo, SP – Brazil, [bianca.garcia@einstein.br](mailto:bianca.garcia@einstein.br)
- **Emanuel dos Santos Pereira**, Hospital Israelita Albert Einstein, São Paulo, SP – Brazil, [emanuel.pereira@einstein.br](mailto:emanuel.pereira@einstein.br)
- **Raquel Afonso Caserta Eid**, Hospital Israelita Albert Einstein, São Paulo, SP – Brazil, [raquel.caserta@einstein.br](mailto:raquel.caserta@einstein.br)
- **Ana Carolina Pereira Nunes Pinto**, Evidence-Based Health Program, Escola Paulista de Medicina (EPM) – Universidade Federal de São Paulo (UNIFESP), São Paulo, Brazil, and Universidade Federal do Amapá (UNIFAP), Macapá, AP – Brazil, [anacarolinapnp@hotmail.com](mailto:anacarolinapnp@hotmail.com)
- **Ricardo Kenji Nawa\***, Hospital Israelita Albert Einstein, São Paulo, SP – Brazil, [ricardo.nawa@einstein.br](mailto:ricardo.nawa@einstein.br)

**Word count:** 1894 words

**\*Corresponding author**

Ricardo Kenji Nawa  
Department of Critical Care Medicine  
Hospital Israelita Albert Einstein  
Avenida Albert Einstein, no. 627 / 701  
ZIP: 05652- 900 – Sao Paulo, SP / Brazil.  
E-mail: [ricardo.nawa@einstein.br](mailto:ricardo.nawa@einstein.br)

## Abstract

**Introduction:** Oxygen is the most common drug used in critical care patients to correct episodes of hypoxemia. The adoption of new technologies in clinical practice, such as closed-loop systems for an automatic oxygen titration, may improve outcomes and reduce the healthcare professionals' workload at the bedside; however, certainty of the evidence regarding the safety and benefits are still low. We aim to evaluate the effectiveness, efficacy and safety of the closed-loop oxygen control for hypoxemic patients during the hospitalization period by conducting a systematic review and meta-analysis. **Methods and analysis:** MEDLINE, CENTRAL, EMBASE, LILACS, CINAHL and LOVE evidence databases will be searched. Randomized controlled trials and crossover studies investigating the PICO will be included. The primary outcomes will be the time in the SpO<sub>2</sub> target. Secondary outcomes will include time for oxygen weaning time; length of stay; costs; adverse events; mortality; and healthcare professionals workload. Two reviewers will independently screen and extract data and perform quality assessment of included studies. The Cochrane risk of bias tool will be used to assess risk of bias. The RevMan V5.4 software will be used for statistical analysis. Heterogeneity will be analyzed using I<sup>2</sup> statistics. Mean difference or standardized mean difference with 95% CI and *p* value will be used to calculate treatment effect for outcome variables. **Ethics and dissemination:** Ethical approval is not required because this systematic review and meta-analysis is based on previously published data. Final results will be published in peer-reviewed journals and presented at relevant conferences and events. **PROSPERO registration number:** [CRD 42022306033]

**Keywords:** Oxygen; oxygen inhalation therapy; hypoxia; hyperoxia; artificial intelligence; machine learning.

## Strengths and Limitations

- This study will be reported in accordance with the Preferred Reporting Items for Systematic Reviews and Meta-Analysis Protocols (PRISMA-P) guidelines.
- The steps of data screening, extraction and methodological quality assessment will be performed by two reviewers independently.
- Standardized methodological evaluation tools will be used to assess the risk of bias of included studies in the review.
- The absence of sufficient high-quality studies, heterogeneity in the interventions, high missing or dropout, and small sample size might be the limitations for this systematic review.

## Introduction

Oxygen is vital for cellular metabolism and it is considered the most common drug used in critical care patients to correct episodes of hypoxemia [1,2]. Low levels of oxygen in the arterial blood are frequently associated with impairment of adequate gas exchange [1,2], and prolonged cellular hypoxia promotes rapid and severe organ injuries triggered by natural adaptive mechanisms [2,3]. Thus, supplemental oxygen administration can be considered a lifesaving treatment, and may reduce the morbidity and mortality associated with hypoxemia [1,4].

Despite the benefits of oxygen therapy indication, both hypoxemia and hyperoxia, have potential harmful side effects and complications [5–8]. The literature suggests that safe and acceptable targets of peripheral oxygen saturation (SpO<sub>2</sub>) are between 92–98% for patients without lung diseases, and 88–92% for patients with previous lung diseases [9,10]. However, patients' need for oxygen varies during hospital stay, and the manual adjustment to promote adequate oxygen delivery titration has been shown to be ineffective [9]. A precise delivery oxygen method for maintaining the SpO<sub>2</sub> within the target is challenging [10–12]. It is even more challenging when we look at patients requiring invasive mechanical ventilation (IMV) support admitted to the intensive care unit (ICU) who commonly need supplemental oxygen administration during ICU and hospital stay [1,2,4].

The use of artificial intelligence (AI) and machine learning (ML) is increasing in health science to make predictions, improve the interpretation of monitored data, and support decision-making [10]. Closed-loop systems are part of these advances, using a feedback principle to maintain a given variable around a desired set point [10–12]. Delivery oxygen devices based on closed-loop

1  
2  
3 technology have been developed and utilized in patient care in order to provide  
4 a real-time adjustment of oxygen titration, based on patients' SpO<sub>2</sub> preventing  
5 episodes of hypoxemia or hyperoxia [11,12]. The adoption of new technologies  
6 of AI and ML in clinical practice, may reduce the healthcare professionals'  
7 workload at the bedside; however, there is low certainty evidence for their safety  
8 and benefits [11,12]. It is still unclear whether closed-loop oxygen control devices  
9 could improve clinical outcomes, and with the technological advances, new  
10 randomized clinical trials (RCTs) [13–21] have been published since the last two  
11 systematic reviews were conducted [11,12]. Thus, the aim of this systematic  
12 review is to investigate the effectiveness, efficacy, and safety of the closed-loop  
13 oxygen control for hypoxemic patients during hospitalization.

## 24 **Methods and analysis**

25 This study is reported in accordance with the Preferred Reporting Items for  
26 Systematic Reviews and Meta-Analysis Protocols (PRISMA-P) statement [22]  
27 and followed the recommendations of the Cochrane Collaboration Handbook.  
28 The protocol is registered at the International Prospective Register of Systematic  
29 Reviews (PROSPERO) [23], under registration number CRD42022306033.

### 30 ***Patient and public involvement***

31 No patient or public involved. Only data already existent in the literature and the  
32 aforementioned sources will be used in this study. Patients and/or the public were  
33 not involved in the design, conduct, reporting, or dissemination plans of this  
34 research.

### 35 ***Search strategy***

36 A search strategy was initially designed for the Medical Literature Analysis and  
37 the Retrieval System Online – MEDLINE, via PubMed by an information



specialist, responsible for assisting the authors, searching potential studies for inclusion in their reviews, and for keeping up to date with Cochrane methodological developments in information retrieval. The search strategy was independently peer-reviewed by the information specialist, and afterwards will be adapted for use into five databases, as follows: 1) Cochrane Central Register of Controlled Trials (CENTRAL) – via Wiley; 2) Excerpta Medica dataBASE (EMBASE) – via Elsevier; 3) the Latin American the Caribbean Literature in Health Sciences (LILACS) – via Virtual Health Library; 4) Cumulative Index to Nursing and Allied Health Literature (CINALH) – via Elton Bryson Stephens Company (EBSCO); and 5) LOVE evidence databases. A handsearching will be performed to check preprints, editorials about the included studies, errata of published articles, and references lists from the included studies and any relevant systematic review identified. We will track the randomized controlled trials in progress on a specific website (<https://ClinicalTrials.gov>) and on the World Health Organization (WHO) website. There will not be restrictions to any specific language, date or type of publication. The detailed search strategy for MEDLINE – via PubMed is shown in **Table 1**. The study selection process will be conducted by two reviewers independently, and any disagreement between the reviewers will be resolved by consensus or by consulting a third reviewer.

**Table 1** – Search strategy for MEDLINE via PubMed

| Search number | Search terms                                                                                                                                                                                                                                                                                                          |
|---------------|-----------------------------------------------------------------------------------------------------------------------------------------------------------------------------------------------------------------------------------------------------------------------------------------------------------------------|
| #1            | "Oxygen Inhalation Therapy"[Mesh] OR "Oxygen"[Mesh] OR oxygen*[tiab] OR Dioxygen[tiab] OR O2[tiab] OR FiO2[tiab]                                                                                                                                                                                                      |
| #2            | concentrat*[tiab] OR inspir*[tiab] OR inhal*[tiab] OR level*[tiab] OR tension*[tiab] OR fraction*[tiab] OR arterial*[tiab] OR saturation supply*[tiab] OR supplement*[tiab] OR supplie*[tiab] OR therap*[tiab] OR administr*[tiab] OR dosag*[tiab] OR dose*[tiab] OR dosing*[tiab] OR titrat*[tiab] OR deliver*[tiab] |

|    |                                                                                                                                                                                                                                                                                                                                                                                                                                                               |
|----|---------------------------------------------------------------------------------------------------------------------------------------------------------------------------------------------------------------------------------------------------------------------------------------------------------------------------------------------------------------------------------------------------------------------------------------------------------------|
| #3 | automat*[tiab] OR algorithms[tiab] OR system*[tiab] OR closed-loop[tiab] OR closed loop[tiab] OR intelligen*[tiab] OR targeted[tiab] OR machine learning[tiab]                                                                                                                                                                                                                                                                                                |
| #4 | adult[All Fields] OR middle aged[sb] OR age[tw] OR (aged[tiab] OR aged[MESH] OR geriatric*[tiab] geriatrics[MESH] OR elder*[tiab] OR olding[tiab] OR ageing[tiab] OR aging[tiab] OR aging[MESH] OR "frail elderly"[MESH])                                                                                                                                                                                                                                     |
| #5 | SpO2[tw] OR oxygen saturation[tw] OR Blood Oxygen Level*[tw] OR Saturation of Peripheral Oxygen[tw] OR oxygen weaning[tw] OR FiO2 weaning[tw] OR Length of stay*[tw] OR Cost*[tw] OR Adverse event*[tw] OR adverse effect*[tw] OR Near Misse*[tw] OR Side Effect*[tw] OR Adverse Reaction*[tw] OR Toxicity[tw] OR Mortalit*[tw] OR Fatality Rate*[tw] OR Death[tw] OR Workload*[tw] OR Work Load*[tw] OR process optimization[tw] OR Quality Improvement*[tw] |
| #6 | ((clinical[Title/Abstract] AND trial[Title/Abstract]) OR clinical trials as topic[MeSH Terms] OR clinical trial[Publication Type] OR random*[Title/Abstract] OR random allocation[MeSH Terms] OR therapeutic use[MeSH Subheading])                                                                                                                                                                                                                            |
| #7 | #1 AND #2 AND #3 AND #4 AND #5 AND #6                                                                                                                                                                                                                                                                                                                                                                                                                         |
| #8 | (animals [mh] NOT humans [mh])                                                                                                                                                                                                                                                                                                                                                                                                                                |
| #9 | #7 NOT #8                                                                                                                                                                                                                                                                                                                                                                                                                                                     |

This search strategy will be modified as required for other electronic databases.

### ***Inclusion criteria***

The eligibility criteria were determined using the Population, Intervention, Comparator, and Outcome (PICO) acronym [24]. The studies will be considered eligible based on the following inclusion criteria, as follows: 1) population: hospitalized adult patients requiring supplemental oxygen – either for hypoxemic patients ( $SpO_2 < 92\%$ ) or with acute chronic hypoxemia ( $SpO_2 < 88\%$ ); 2) type of interventions: any devices that allow an automatic oxygen delivery, including invasive and non-invasive devices; low and high flow oxygen devices; 3) type of comparison: manual adjustments of oxygen; 4) type of outcome: time within the  $SpO_2$  target, oxygen weaning time, length of stay, costs, adverse events, mortality, and healthcare professionals workload – process optimization. Two

1  
2  
3 reviewers (CGM and AGV) will independently assess the titles, abstracts, and  
4  
5 full-text published RCTs without language restriction.  
6

### 7 ***Study selection***

8  
9  
10 The reviewers will identify and exclude duplicates and collate multiple reports of  
11  
12 the same study so that each study, rather than each report, is the unit of interest  
13  
14 in the review. For the selection process we will use Rayyan – a web and mobile  
15  
16 app for systematic reviews software [25]. The selection process will be recorded  
17  
18 in sufficient detail to complete the Preferred Reporting Items for Systematic  
19  
20 Review and Meta-Analysis (PRISMA) flow diagram (**Figure 1**). Two review  
21  
22 authors (CGM and AGV) will independently screen the titles and abstracts of all  
23  
24 the potential studies we identify as a result of the search. All the potential full-  
25  
26 texts of the articles that fulfilled eligibility criteria will be included. If a consensus  
27  
28 is not reached, a third reviewer (ACP) will be consulted to solve potential  
29  
30 disagreements regarding the included articles.  
31  
32  
33  
34

### 35 ***Outcome measures***

36  
37 The primary outcome of interest will be the time spent within the peripheral arterial  
38  
39 oxygen saturation target range. Secondary outcomes of interest will be the time  
40  
41 for oxygen weaning time, length of stay, costs, adverse events, mortality, and  
42  
43 healthcare professional's workload.  
44  
45  
46

### 47 ***Data extraction***

48  
49 Two reviewers (CGM and AGV) will independently extract the data on a standard  
50  
51 worksheet. Data will be extracted from each included study utilizing a  
52  
53 standardized spreadsheet developed at Microsoft Excel, as follows: authors,  
54  
55 year, protocol number, DOI, study type, country of publication; the participants  
56  
57 demographics (i.e.: age, gender, inclusion and exclusion criteria, number of  
58  
59  
60

1  
2  
3 participants, diseases, severity scores, severity of condition, comorbidity, phase  
4 of hypoxemia), Interventions – type of device and form of delivery (i.e.:  
5 mechanical ventilation or conventional oxygen therapy), duration of intervention,  
6 follow-up, Comparators and Outcomes – defined in this review. We will also  
7 extract variables, as follows: time spent within the target SpO<sub>2</sub> and other relevant  
8 variables to answer the review question (i.e.: oxygen weaning time, length of stay,  
9 costs, adverse events, mortality, health professional's workload – process  
10 optimization). Additionally, we will extract data from the funding, sponsorship of  
11 the included studies and notable conflicts of interest of trial authors. For missing  
12 data, we will contact the corresponding authors of the studies through the email  
13 provided. In case of crossover studies inclusions, we will consider a paired  
14 analysis or if carry-over is thought to be a problem, the first period will be used to  
15 perform the analysis. If the data are homogeneous for conducting meta-analyses,  
16 one review author will transfer data into the Review Manager (RevMan) version  
17 5.4 software. We will double-check if the data are correctly entered by comparing  
18 the data presented in the systematic review with those in the study report.

### ***Methodological quality assessment***

19  
20  
21  
22  
23  
24  
25  
26  
27  
28  
29  
30  
31  
32  
33  
34  
35  
36  
37  
38  
39  
40  
41  
42  
43  
44  
45  
46  
47  
48  
49  
50  
51  
52  
53  
54  
55  
56  
57  
58  
59  
60  
The risk of bias of the included trials will be assessed using the Cochrane Risk  
of Bias 2 (RoB2) tool for randomized trials.

### ***Risk of bias***

Assessment of the risk of bias of individual studies was performed as  
recommended by the Cochrane Collaboration Handbook [26]. The RoB2 [27] will  
be used to evaluate the risk of bias according to five domains: 1) bias arising from  
the randomization process; 2) bias due to deviations from intended interventions;  
3) bias due to missing outcome data; 4) bias in measurement of the outcome;

1  
2  
3 and 5) bias in selection of the reported result. Each domain will be considered  
4  
5 within one of the three levels, as follows: low risk of bias, some concerns, or high  
6  
7 risk of bias [27]. We will involve a third reviewer (ACP) if a consensus cannot be  
8  
9 reached. With the concurrence of the reviewers on the final judgment of all the  
10  
11 included trials, the result will be displayed in a table or graph.  
12  
13

### 14 ***Assessment of bias in conducting the systematic review***

15  
16  
17 The review will be conducted according to this published protocol and any  
18  
19 deviation will be reported in the "differences between protocol and review" section  
20  
21 of the systematic review.  
22  
23

### 24 ***Assessment of certainty of evidence***

25  
26  
27 The Grading of Recommendations Assessment, Development and Evaluation  
28  
29 (GRADE) system will be used to measure and summarize the overall current  
30  
31 evidence of each outcome [28]. The GRADE system consists of five items: 1)  
32  
33 study limitations – risk of bias; 2) inconsistency of results (heterogeneity); 3)  
34  
35 indirectness of evidence; 4) imprecision in effect estimates, and 5) reporting bias.  
36  
37 The quality of evidence was classified into four categories, as follows: high,  
38  
39 moderate, low, and very low; and it was related to the studies that contributed  
40  
41 data to the main prespecified outcomes. All analyses were performed using  
42  
43 GRADEpro Guideline Development Tool (GRADEpro GDT) software [29]. Two  
44  
45 authors will rate it independently and a third author will address any discrepancy  
46  
47 found in the study.  
48  
49  
50

### 51 ***Data synthesis***

52  
53  
54 Review Manager V.5.4 (Cochrane Collaboration) software will be used to conduct  
55  
56 the meta-analysis if appropriate – that is: statistically and clinically homogeneous.  
57  
58 A random-effects model will be used. The mean difference or standardized mean  
59  
60

1  
2  
3 difference will be used to analyze continuous variables with 95% confidence  
4 interval (CI). Dichotomous outcomes will be presented as risk ratios (RR) with  
5 95% CI. Heterogeneity among included trials will be measured using the  $I^2$   
6  
7  
8  
9  
10  
11  
12  
13  
14  
15  
16  
17  
18  
19  
20  
21  
22  
23  
24  
25  
26  
27  
28  
29  
30  
31  
32  
33  
34  
35  
36  
37  
38  
39  
40  
41  
42  
43  
44  
45  
46  
47  
48  
49  
50  
51  
52  
53  
54  
55  
56  
57  
58  
59  
60

difference will be used to analyze continuous variables with 95% confidence interval (CI). Dichotomous outcomes will be presented as risk ratios (RR) with 95% CI. Heterogeneity among included trials will be measured using the  $I^2$  statistic. If it is identified as substantial heterogeneity, we will report and explore it through a pre-specified subgroup analysis. In addition, sensitivity analysis will be performed through separate analyses of studies judged to have a high risk of bias or a methodological weakness considered important. In cases where the combination of data does not make it possible to do the meta-analysis, we will carry out only a qualitative synthesis of each included study, of the ongoing studies identified in our search, and of the publication bias analysis.

### ***Subgroup analysis***

We plan to perform analysis of subgroups, as follows: underlying disease; hypoxemia stage (acute versus chronic); and SpO<sub>2</sub> target (threshold < 92% versus > 92%).

### **Ethics and dissemination**

Ethical approval and additional informed consent application are not required because this systematic review is based on previously published data. The final results will be published in a peer-reviewed journal.

### **Author Contributions**

Conceptualisation – AGSV, CGM, RKN.

Protocol writing – AGSV, CGM, RKN.

Methodology – AGSV, ACPNP, BMSPG, CGM, RKN.

Project administration – AGSV, ACPNP, CGM, RKN.

Supervision – AGSV, CGM, RKN.

Validation – AGSV, ACPNP, CGM, RKN.

1  
2  
3 Writing – original draft – AGSV, ACPNP, BMSPG, CGM, RKN.  
4

5 Writing – review & editing – ACPNP, AGSV, BMSPG, CGM, ESP, RACE, and  
6  
7 RKN.  
8  
9

## 10 Funding

11  
12  
13 The authors declare this research received no specific grant from any funding  
14  
15 agency in the public, commercial or not-for-profit sectors  
16

## 17 Competing of interests

18  
19  
20 None declared.  
21  
22

## 23 Data statement

24  
25  
26 Not applicable.  
27

## 28 Patient consent for publication

29  
30  
31 Not applicable.  
32  
33

## 34 ORCID IDs

35  
36 Caroline Gomes Mól, <http://orcid.org/0000-0001-9493-0150>

37 Aléxia Gabriela da Silva Vieira, <http://orcid.org/0000-0002-6048-716X>

38 Bianca Maria Schneider Pereira Garcia, <http://orcid.org/0000-0003-1863-109X>

39 Emanuel dos Santos Pereira, <http://orcid.org/0000-0001-8620-3420>

40 Raquel Afonso Caserta Eid, <http://orcid.org/0000-0002-8241-3241>

41 Ana Carolina Pereira Nunes Pinto, <http://orcid.org/0000-0002-1505-877X>

42 Ricardo Kenji Nawa, <http://orcid.org/0000-0002-0852-7013>  
43  
44  
45  
46  
47

## 48 References

- 49  
50  
51 1 Gilbert-Kawai ET, Mitchell K, Martin D, *et al*. Permissive hypoxaemia versus  
52 normoxaemia for mechanically ventilated critically ill patients. *Cochrane*  
53 *Database Syst Rev* 2014;:CD009931.  
54  
55 2 O’Driscoll BR, Smith R. Oxygen Use in Critical Illness. *Respir Care*  
56 2019;**64**:1293–307.  
57  
58 3 Allardet-Servent J, Sicard G, Metz V, *et al*. Benefits and risks of oxygen  
59 therapy during acute medical illness: Just a matter of dose! *Rev Med*  
60

- 1  
2  
3 *Interne* 2019;**40**:670–6.  
4  
5 4 de Jonge E, Peelen L, Keijzers PJ, *et al.* Association between administered  
6 oxygen, arterial partial oxygen pressure and mortality in mechanically  
7 ventilated intensive care unit patients. *Crit Care* 2008;**12**:R156.  
8  
9 5 Barbateskovic M, Schjørring OL, Krauss SR, *et al.* Higher vs Lower  
10 Oxygenation Strategies in Acutely Ill Adults. *Chest*. 2021;**159**:154–73.  
11 doi:10.1016/j.chest.2020.07.015  
12  
13 6 Valencia Gallardo JM, Solé Violán J, Rodríguez de Castro F. [Translated  
14 article] Oxygen therapy. Considerations regarding its use in acute ill  
15 patients. *Arch Bronconeumol* 2022;**58**:T102–3.  
16  
17 7 Chu DK, Kim LH-Y, Young PJ, *et al.* Mortality and morbidity in acutely ill  
18 adults treated with liberal versus conservative oxygen therapy (IOTA): a  
19 systematic review and meta-analysis. *Lancet* 2018;**391**:1693–705.  
20  
21 8 Li L, Zhang Y, Wang P, *et al.* Conservative versus liberal oxygen therapy  
22 for acutely ill medical patients: A systematic review and meta-analysis. *Int J*  
23 *Nurs Stud* 2021;**118**:103924.  
24  
25 9 Website. British thoracic Society emergency oxygen audit report national  
26 audit period [https://www.brit-thoracic.org.uk/document-library/quality-](https://www.brit-thoracic.org.uk/document-library/quality-improvement/audit-reports/emergency-oxygen-2015/)  
27 [improvement/audit-reports/emergency-oxygen-2015/](https://www.brit-thoracic.org.uk/document-library/quality-improvement/audit-reports/emergency-oxygen-2015/)  
28  
29 10 Rush B, Celi LA, Stone DJ. Applying machine learning to continuously  
30 monitored physiological data. *J Clin Monit Comput* 2019;**33**:887–93.  
31  
32 11 Denault M-H, Péroquin F, Lajoie A-C, *et al.* Automatic versus Manual  
33 Oxygen Titration in Patients Requiring Supplemental Oxygen in the  
34 Hospital: A Systematic Review and Meta-Analysis. *Respiration*  
35 2019;**98**:178–88.  
36  
37 12 Sanchez-Morillo D, Olaby O, Fernandez-Granero MA, *et al.* Physiological  
38 closed-loop control in intelligent oxygen therapy: A review. *Comput*  
39 *Methods Programs Biomed* 2017;**146**:101–8.  
40  
41 13 Chelly J, Mazerand S, Jochmans S, *et al.* Automated vs. conventional  
42 ventilation in the ICU: a randomized controlled crossover trial comparing  
43 blood oxygen saturation during daily nursing procedures (I-NURSING). *Crit*  
44 *Care* 2020;**24**:453.  
45  
46 14 De Bie AJR, Neto AS, van Meenen DM, *et al.* Fully automated  
47 postoperative ventilation in cardiac surgery patients: a randomised clinical  
48 trial. *Br J Anaesth* 2020;**125**:739–49.  
49  
50 15 Denault M-H, Ruel C, Simon M, *et al.* Evaluation of hyperoxia-induced  
51 hypercapnia in obese patients after cardiac surgery: a randomized  
52 crossover comparison of conservative and liberal oxygen administration.  
53 *Can J Anaesth* 2020;**67**:194–202.  
54  
55 16 Eremenko AA, Komnov RD, Titov PA, *et al.* Comparing the Intellivent-



ASV® Mode with Conventional Ventilation Modes during Weaning after Uncomplicated Cardiac Surgery. *Messenger of ANESTHESIOLOGY AND RESUSCITATION*. 2021;**18**:36–45. doi:10.21292/2078-5658-2021-18-3-36-45

- 17 Hansen EF, Hove JD, Bech CS, *et al*. Automated oxygen control with O2matic during admission with exacerbation of COPD. *Int J Chron Obstruct Pulmon Dis* 2018;**13**:3997–4003.
- 18 Harper JC, Kearns NA, Maijers I, *et al*. Closed-Loop Oxygen Control Using a Novel Nasal High-Flow Device: A Randomized Crossover Trial. *Respir Care* 2021;**66**:416–24.
- 19 L’Her E, Jaber S, Verzilli D, *et al*. Automated closed-loop standard manual oxygen administration after major abdominal or thoracic surgery: an international multicentre randomised controlled study. *Eur Respir J* 2021;**57**. doi:10.1183/13993003.00182-2020
- 20 Roca O, Caritg O, Santafé M, *et al*. Closed-loop oxygen control improves oxygen therapy in acute hypoxemic respiratory failure patients under high flow nasal oxygen: a randomized cross-over study (the HILOOP study). *Crit Care* 2022;**26**:108.
- 21 Arnal J-M, Garnero A, Novotni D, *et al*. Closed loop ventilation mode in Intensive Care Unit: a randomized controlled clinical trial comparing the numbers of manual ventilator setting changes. *Minerva Anesthesiol* 2018;**84**:58–67.
- 22 Shamseer L, Moher D, Clarke M, *et al*. Preferred reporting items for systematic review and meta-analysis protocols (PRISMA-P) 2015: elaboration and explanation. *BMJ* 2015;**350**:g7647.
- 23 PROSPERO. <http://www.crd.york.ac.uk/PROSPERO> (accessed 31 Jan 2022).
- 24 Website. Thomas J, Kneale D, Mckenzie JE, *et al*. Chapter 2: Determining the scope of the review and the questions it will address. In 2021;6. Available from [www.training.cochrane.org/handbook](http://www.training.cochrane.org/handbook)
- 25 Ouzzani M, Hammady H, Fedorowicz Z, *et al*. Rayyan-a web and mobile app for systematic reviews. *Syst Rev* 2016;**5**:210.
- 26 Higgins JPT, Thomas J. *Cochrane Handbook for Systematic Reviews of Interventions*. John Wiley & Sons 2019.
- 27 Higgins JPT, Altman DG, Gotzsche PC, *et al*. The Cochrane Collaboration’s tool for assessing risk of bias in randomised trials. *BMJ*. 2011;**343**:d5928–d5928. doi:10.1136/bmj.d5928
- 28 GRADE handbook. <http://guidelinedevelopment.org/handbook> (accessed 31 Jan 2022).
- 29 GRADEpro. <http://gradepr.org> (accessed 31 Jan 2022).

1  
2  
3 **Figure legends**  
4  
5

6 **Figure 1** – Preferred reporting items for systematic reviews and meta-analyses  
7 – PRISMA flow diagram describing the search strategy.  
8  
9

10  
11  
12  
13  
14  
15  
16  
17  
18  
19  
20  
21  
22  
23  
24  
25  
26  
27  
28  
29  
30  
31  
32  
33  
34  
35  
36  
37  
38  
39  
40  
41  
42  
43  
44  
45  
46  
47  
48  
49  
50  
51  
52  
53  
54  
55  
56  
57  
58  
59  
60

For peer review only

1  
2  
3  
4  
5  
6  
7  
8  
9  
10  
11  
12  
13  
14  
15  
16  
17  
18  
19  
20  
21  
22  
23  
24  
25  
26  
27  
28  
29  
30  
31  
32  
33  
34  
35  
36  
37  
38  
39  
40  
41  
42  
43  
44  
45  
46  
47  
48  
49  
50  
51  
52  
53  
54  
55  
56  
57  
58  
59  
60

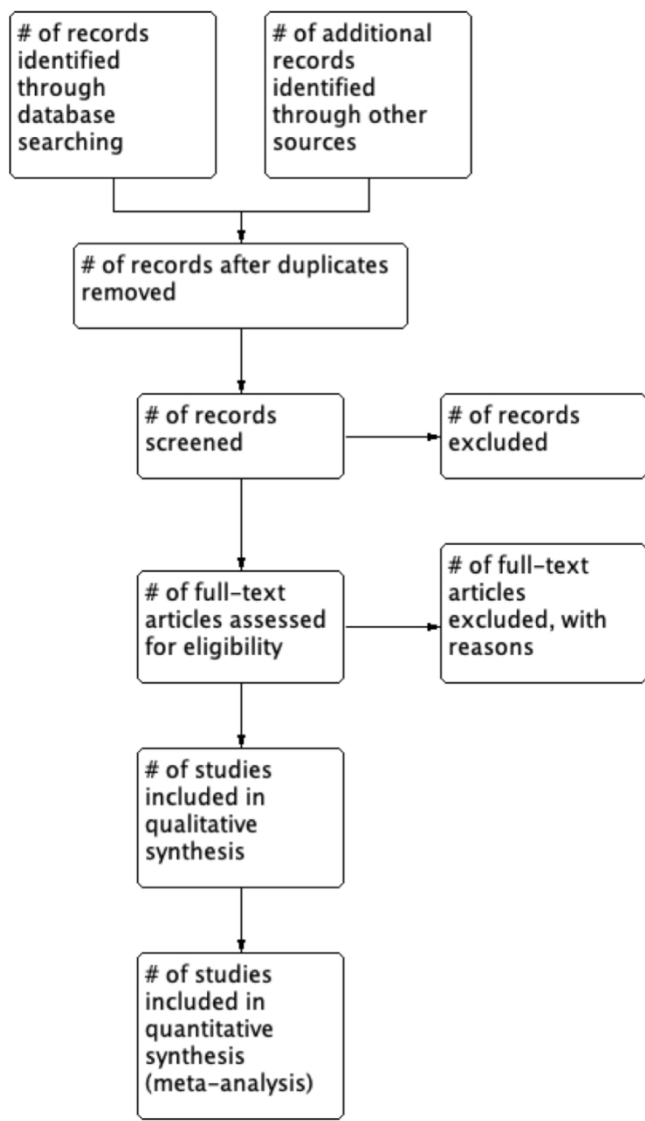

Figure 1 – Preferred reporting items for systematic reviews and meta-analyses – PRISMA flow diagram describing the search strategy.

190x275mm (166 x 166 DPI)

## The Preferred Reporting Items for Systematic Review and Meta-Analysis Protocols (PRISMA-P) checklist.

| Section and topic                 | Item No | Checklist item                                                                                                                                                                                                                | Page No |
|-----------------------------------|---------|-------------------------------------------------------------------------------------------------------------------------------------------------------------------------------------------------------------------------------|---------|
| <b>Administrative information</b> |         |                                                                                                                                                                                                                               |         |
| Title:                            |         |                                                                                                                                                                                                                               |         |
| Identification                    | 1a      | Identify the report as a protocol of a systematic review                                                                                                                                                                      | 01      |
| Update                            | 1b      | If the protocol is for an update of a previous systematic review, identify as such                                                                                                                                            | 04      |
| Registration                      | 2       | If registered, provide the name of the registry (such as PROSPERO) and registration number                                                                                                                                    | 02, 04  |
| Authors:                          |         |                                                                                                                                                                                                                               |         |
| Contact                           | 3a      | Provide name, institutional affiliation, e-mail address of all protocol authors; provide physical mailing address of corresponding author                                                                                     | 01      |
| Contributions                     | 3b      | Describe contributions of protocol authors and identify the guarantor of the review                                                                                                                                           | 09      |
| Amendments                        | 4       | If the protocol represents an amendment of a previously completed or published protocol, identify as such and list changes; otherwise, state plan for documenting important protocol amendments                               | 08      |
| Support:                          |         |                                                                                                                                                                                                                               |         |
| Sources                           | 5a      | Indicate sources of financial or other support for the review                                                                                                                                                                 | 09      |
| Sponsor                           | 5b      | Provide name for the review funder and/or sponsor                                                                                                                                                                             | NA      |
| Role of sponsor or funder         | 5c      | Describe roles of funder(s), sponsor(s), and/or institution(s), if any, in developing the protocol                                                                                                                            | NA      |
| <b>Introduction</b>               |         |                                                                                                                                                                                                                               |         |
| Rationale                         | 6       | Describe the rationale for the review in the context of what is already known                                                                                                                                                 | 03, 04  |
| Objectives                        | 7       | Provide an explicit statement of the question(s) the review will address with reference to participants, interventions, comparators, and outcomes (PICO)                                                                      | 04      |
| <b>Methods</b>                    |         |                                                                                                                                                                                                                               |         |
| Eligibility criteria              | 8       | Specify the study characteristics (such as PICO, study design, setting, time frame) and report characteristics (such as years considered, language, publication status) to be used as criteria for eligibility for the review | 05      |
| Information sources               | 9       | Describe all intended information sources (such as electronic databases, contact with study authors, trial registers or other grey literature sources) with planned dates of coverage                                         | 04,05   |

|                                    |     |                                                                                                                                                                                                                                                  |        |
|------------------------------------|-----|--------------------------------------------------------------------------------------------------------------------------------------------------------------------------------------------------------------------------------------------------|--------|
| Search strategy                    | 10  | Present draft of search strategy to be used for at least one electronic database, including planned limits, such that it could be repeated                                                                                                       | 13     |
| Study records:                     |     |                                                                                                                                                                                                                                                  |        |
| Data management                    | 11a | Describe the mechanism(s) that will be used to manage records and data throughout the review                                                                                                                                                     | 06, 07 |
| Selection process                  | 11b | State the process that will be used for selecting studies (such as two independent reviewers) through each phase of the review (that is, screening, eligibility and inclusion in meta-analysis)                                                  | 06     |
| Data collection process            | 11c | Describe planned method of extracting data from reports (such as piloting forms, done independently, in duplicate), any processes for obtaining and confirming data from investigators                                                           | 06, 07 |
| Data items                         | 12  | List and define all variables for which data will be sought (such as PICO items, funding sources), any pre-planned data assumptions and simplifications                                                                                          | 06, 07 |
| Outcomes and prioritization        | 13  | List and define all outcomes for which data will be sought, including prioritization of main and additional outcomes, with rationale                                                                                                             | 06, 07 |
| Risk of bias in individual studies | 14  | Describe anticipated methods for assessing risk of bias of individual studies, including whether this will be done at the outcome or study level, or both; state how this information will be used in data synthesis                             | 07, 08 |
| Data synthesis                     | 15a | Describe criteria under which study data will be quantitatively synthesized                                                                                                                                                                      | 08, 09 |
|                                    | 15b | If data are appropriate for quantitative synthesis, describe planned summary measures, methods of handling data and methods of combining data from studies, including any planned exploration of consistency (such as $I^2$ , Kendall's $\tau$ ) | 08, 09 |
|                                    | 15c | Describe any proposed additional analyses (such as sensitivity or subgroup analyses, meta-regression)                                                                                                                                            | 08, 09 |
|                                    | 15d | If quantitative synthesis is not appropriate, describe the type of summary planned                                                                                                                                                               | 09     |
| Meta-bias(es)                      | 16  | Specify any planned assessment of meta-bias(es) (such as publication bias across studies, selective reporting within studies)                                                                                                                    | NA     |
| Confidence in cumulative evidence  | 17  | Describe how the strength of the body of evidence will be assessed (such as GRADE)                                                                                                                                                               | 08     |
